# Supplementary material for: A randomised phase I study of etrolizumab (rhuMAb β7) in moderate to severe ulcerative colitis
Source: HighWire-hosted journal article supplement (doi:10.1136/gutjnl-2011-301769), 2012-06-20
Supplement: gutjnl-2011-301769-s3.pdf [file gutjnl-2011-301769-s3.pdf]

Supplementary Figure 1. Representative PK and PD plots for individual patients in each cohort are shown. PK values reported are based on the observed data and correspond to the first time point at which receptor occupancy is released (i.e., <100% saturation.)

Supplementary Figure 2. Individual patient changes in endoscopy scores for SAD and MD stages.

Supplementary Table 1. Patient demographics and baseline characteristics.

SAD cohort.

|                                              | <b>Placebo<br/>(n=5)</b> | <b>0.3<br/>mg/kg<br/>IV (n=4)</b> | <b>1<br/>mg/kg<br/>IV<br/>(n=4)</b> | <b>3<br/>mg/kg<br/>IV<br/>(n=4)</b> | <b>3 mg/kg<br/>SC (n=4)</b> | <b>10 mg/kg<br/>IV (n=4)</b> |
|----------------------------------------------|--------------------------|-----------------------------------|-------------------------------------|-------------------------------------|-----------------------------|------------------------------|
| Gender, male (%)                             | 2 (40)                   | 4 (100)                           | 4 (100)                             | 3 (75)                              | 1(25)                       | 3(75)                        |
| Age (years), mean<br>(SD)                    | 30.2(11)<br>6 (5-29)     | 41.5<br>(7.9)                     | 45<br>(17.6)                        | 43.3<br>(6.4)                       | 32.3 (9.8)<br>6.6 (2-8)     | 39.5 (7.9)<br>8.9 (3-20)     |
| Disease Duration<br>years, median<br>(range) |                          | 6.6 (4-9)                         | 13.3 (8-<br>24)                     | 14.9 (7-<br>23)                     |                             |                              |
| Concomitant drug<br>treatment, n (%)         | 4 (80)                   | 2 (50)                            | 1 (25)                              | 3 (75)                              | 2 (50)                      | 4 (75)                       |
| 5-ASA                                        | 1 (20)                   | 0                                 | 0                                   | 2 (50)                              | 1 (25)                      | 0                            |
| Azathioprine                                 | 0 (0)                    | 1 (25)                            | 0                                   | 0                                   | 0                           | 1 (25)                       |
| Mercaptopurine                               | 0 (0)                    | 0                                 | 0                                   | 0                                   | 1 (25)                      | 0                            |
| Methotrexate                                 | 3 (60)                   | 3 (75)                            | 2 (50)                              | 2 (50)                              | 2 (50)                      | 2 (50)                       |
| Corticosteroids                              |                          |                                   |                                     |                                     |                             |                              |
| Baseline MCS,<br>median (range)              | 9 (7–10)                 | 10 (6–<br>11)                     | 9 (8-9)                             | 10 (8-<br>11)                       | 8 (5-9)                     | 10 (8-12)                    |

MD cohort.

|  | <b>Placebo<br/>(n=5)</b> | <b>0.5<br/>mg/kg<br/>SC</b> | <b>1.5<br/>mg/kg<br/>SC (n=5)</b> | <b>3 mg/kg<br/>SC (n=4)</b> | <b>4 mg/kg IV<br/>(n=5)</b> |
|--|--------------------------|-----------------------------|-----------------------------------|-----------------------------|-----------------------------|
|  |                          |                             |                                   |                             |                             |

|                                        |            | (n=4)       |           |            |            |
|----------------------------------------|------------|-------------|-----------|------------|------------|
| Gender, male (%)                       | 3 (60)     | 2 (50)      | 3 (60)    | 3 (75)     | 5 (100)    |
| Age (years), mean (SD)                 | 39 (19)    | 46.3 (11)   | 49.6      | 39.8       | 39 (15.3)  |
| Disease Duration years, median (range) | 5.3 (2-25) | 6 (4-17)    | (15.4)    | (16.6)     | 5.2 (3-20) |
| Concomitant drug treatment, n (%)      |            |             |           |            |            |
| 5-ASA                                  | 2 (60)     | 4 (100)     | 2 (40)    | 2 (50)     | 3 (60)     |
| Azathioprine                           | 1 (20)     | 0           | 1 (20)    | 0          | 1 (20)     |
| Methotrexate                           | 0 (0)      | 0           | 0         | 1 (25)     | 1 (20)     |
| Corticosteroids                        | 4 (80)     | 3 (75)      | 2 (40)    | 2 (50)     | 1 (20)     |
| Previous anti-TNF therapy              | 2 (40)     | 2 (50)      | 2 (40)    | 4 (100)    | 4 (80)     |
| Baseline MCS, median (range)           | 10 (8-11)  | 10.5 (7-12) | 11 (8-11) | 8.5 (4-10) | 9 (6-10)   |

SAD = single ascending dose; MD = multiple dose; SD = standard deviation; SC = subcutaneous; IV = intravenous; 5-ASA = 5-aminosalicylic acid; TNF = tumor necrosis factor; MCS = Mayo Clinic Score; NA = not applicable.
