# Supplementary figures and images for: A randomised phase I study of etrolizumab (rhuMAb β7) in moderate to severe ulcerative colitis
Source: HighWire-hosted journal article supplement (doi:10.1136/gutjnl-2011-301769), 2012-06-20

**SAD Stage**

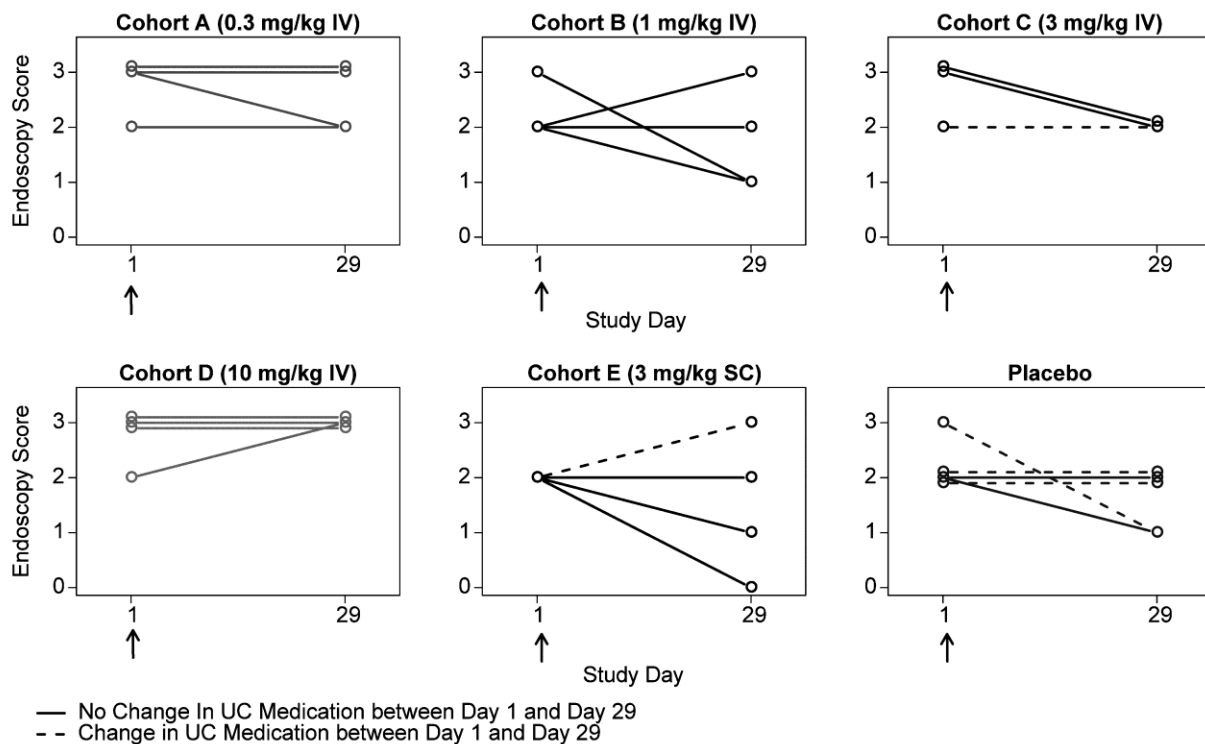

**MD Stage**

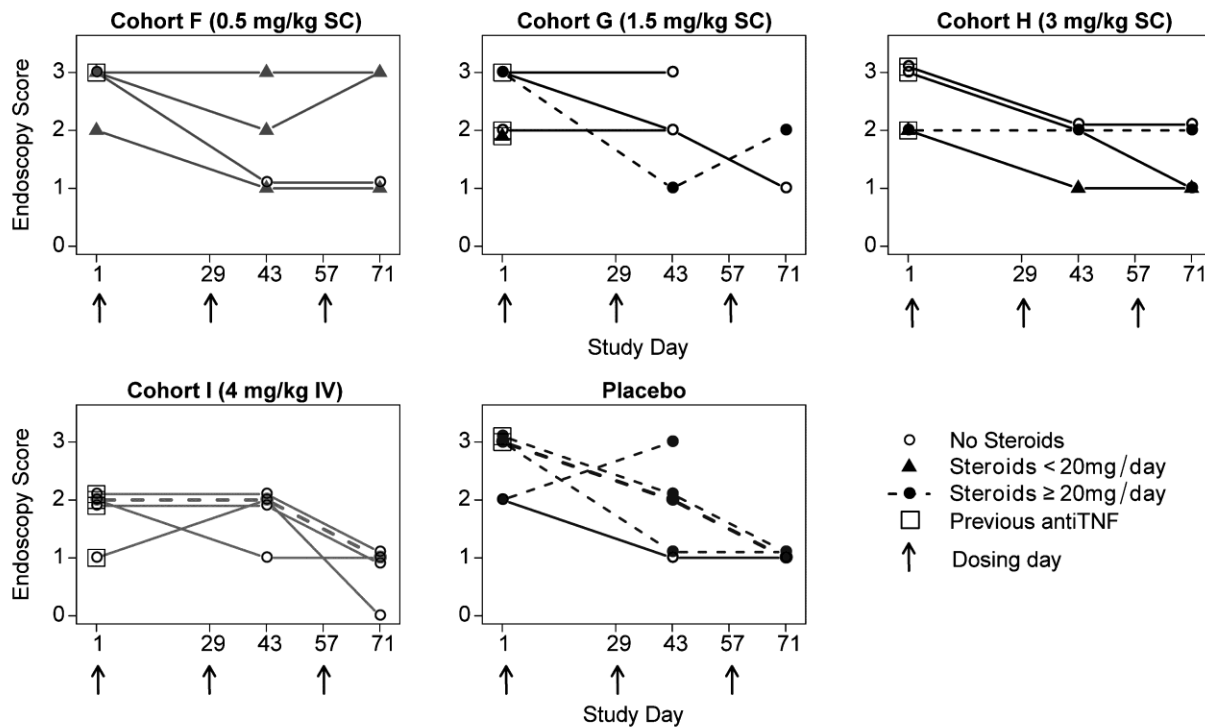

Supplement: gutjnl-2011-301769-s1.pdf [file gutjnl-2011-301769-s1.pdf]

**SAD Stage**



**MD Stage**



Supplement: gutjnl-2011-301769-s2.pdf [file gutjnl-2011-301769-s2.pdf]
